# Supplementary material for: Direct catalytic benzene hydroxylation under mild reaction conditions by using a monocationic μ-nitrido-bridged iron phthalocyanine dimer with 16 peripheral methyl groups
Source: Royal Society of Chemistry journal article supplement (doi:10.1039/d1nj05369h), 2021-12-15
Supplement: d1nj05369h1.pdf [file d1nj05369h1.pdf]

**Supplementary Information for**

**Direct Catalytic Benzene Hydroxylation under Mild Reaction Condition by Using a Monocationic  $\mu$ -Nitrido-Bridged Iron Phthalocyanine Dimer with 16 Peripheral Methyl Groups**

Yasuyuki Yamada,<sup>1,2,3\*</sup> Chee-Ming Teoh,<sup>1</sup> Yuka Toyoda,<sup>2</sup>

and Kentaro Tanaka<sup>1\*</sup>

<sup>1</sup>*Department of Chemistry, Graduate School of Science, Nagoya University, Furo-cho, Chikusa-ku, Nagoya 464-8602, Japan*

<sup>2</sup>*Research Center for Materials Science, Nagoya University, Furo-cho, Chikusa-ku, Nagoya 464-8602, Japan*

<sup>3</sup>*JST, PRESTO, 4-1-8 Honcho, Kawaguchi, Saitama, 332-0012, Japan*

\*E-mail: [yy@chem.nagoya-u.ac.jp](mailto:yy@chem.nagoya-u.ac.jp), [kentaro@chem.nagoya-u.ac.jp](mailto:kentaro@chem.nagoya-u.ac.jp)

## Experimental

### General

All reagents and solvents were purchased at the highest commercial quality available and used without further purification, unless otherwise stated. A monocationic  $\mu$ -nitrido-bridged iron phthalocyanine dimers ( $2^+\cdot I^-$  and  $1^+\cdot I^-$ ) and their silica gel-supported catalysts were prepared according to our previous report.<sup>[1]</sup>  $^1H$  NMR spectra were recorded on a JEOL JNM-ECS400-A (400 MHz for  $^1H$ ) spectrometer at a constant temperature of 298 K.

### Benzene oxidation reaction using $CH_3CN$ as a solvent.

Benzene oxidation was performed in a glass tube equipped with magnetic stirrer. A mixture of a solid-supported catalyst (10 mg, 47  $\mu M$  as  $2^+\cdot I^-$  (or  $1^+\cdot I^-$ )), benzene (50  $\mu L$ , 481 mM), TFA (12  $\mu L$ , 132 mM), and 35% aqueous  $H_2O_2$  (100  $\mu L$ , 983 mM) in  $CH_3CN$  (1.0 mL) was heated in an oil bath at a given temperature with stirring at 900 rpm for a given reaction time. After the reaction mixture was filtered through a disposable membrane filter (ADVANTEC, DISMIC-13JP), 50  $\mu L$  of the resulting filtrate was mixed with 670  $\mu L$  DMSO- $d_6$  and 80  $\mu L$  of a standard solution (10 mM dimethyl sulfone in DMSO- $d_6$ ) for quantitative analysis using  $^1H$ -NMR spectroscopy.

The reaction in the presence of DMPO was performed by adding the given amount of DMPO as a solid to the reaction mixture mentioned above.

As for the oxidation of the benzene derivatives (phenol, chlorobenzene, bromobenzene, trifluoromethylbenzene, and nitrobenzene) were performed in similar manners to the method mentioned above.

In order to confirm the effectiveness and understand the intrinsic errors of the above-mentioned determination of concentrations of the oxidized products by using  $^1H$ -NMR spectroscopy, we prepared a calibration curve using 1,4-dimethoxybenzene as a standard as shown in Figure S1a. The data used for preparing this calibration curve are shown in Figure S1b. The solutions used for  $^1H$ -NMR spectroscopy were prepared by mixing an appropriate standard solution of 1,4-dimethoxybenzene (1, 2, 4, 10, 20, 40, or 100 mM) in  $CH_3CN$  (50  $\mu L$ ) with 670  $\mu L$  DMSO- $d_6$  and 80  $\mu L$  of a standard solution of dimethyl sulfone (10 mM in DMSO- $d_6$ ). Figure S2 shows a typical  $^1H$ -NMR spectrum used for preparing the calibration curve. As shown in Figure S1, a good correlation

coefficient ( $R = 0.999$ ) was obtained although this method includes a relatively high deviations (up to 20%) as shown in Figure S1b.

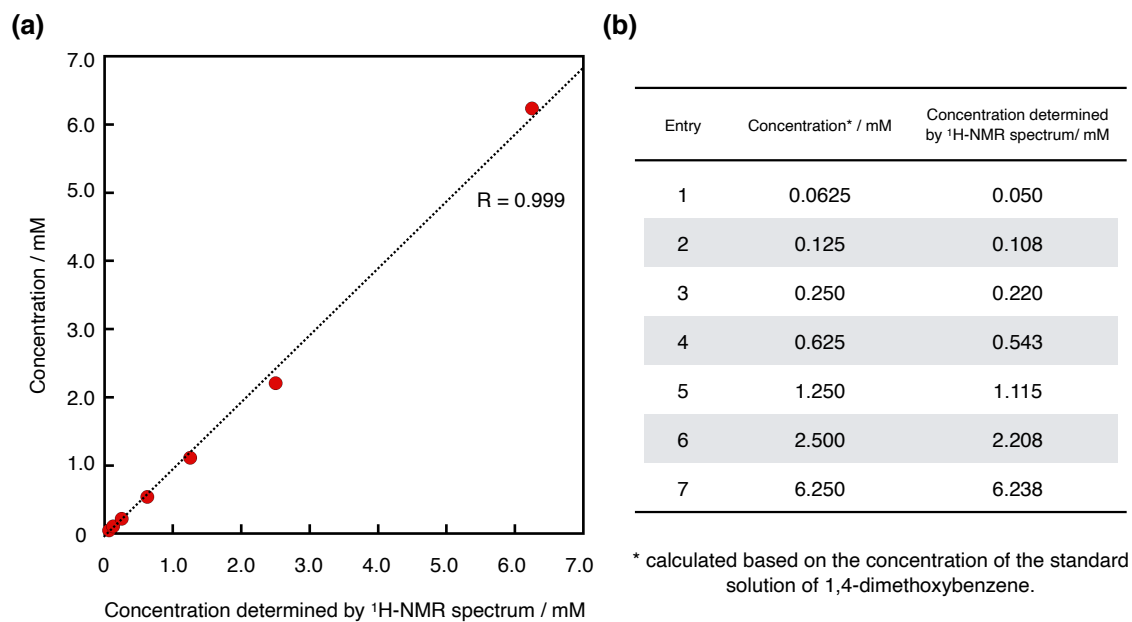

**Figure S1.** (a) A calibration curve to determine the concentration of 1,4-dimethoxybenzene by using  $^1\text{H-NMR}$  spectroscopy. (b) A table showing the data used for preparing the calibration curve shown in Figure S1a.

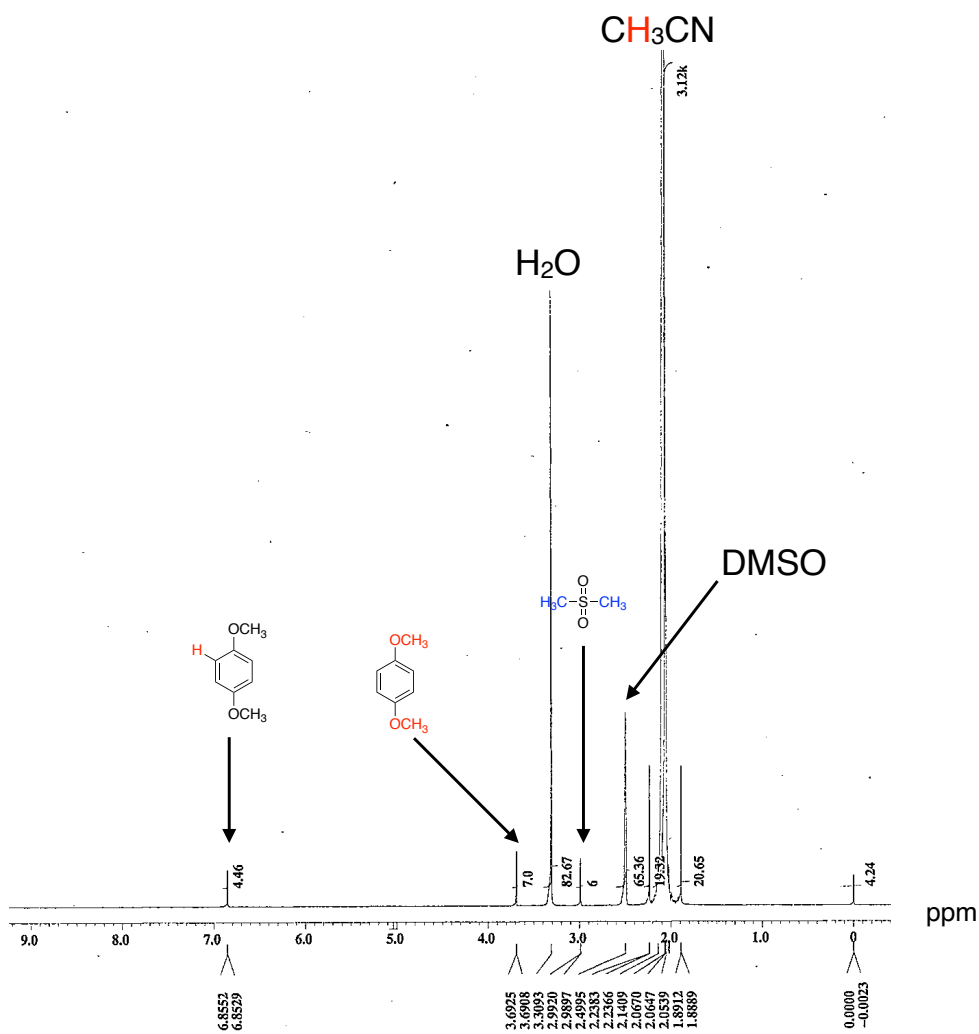

**Figure S2.**  $^1\text{H-NMR}$  spectrum of a mixture containing 1.25 mM of 1,4-dimethoxybenzene and 1.0 mM of dimethylsulfone in a mixture of  $\text{DMSO-}d_6$  and  $\text{CH}_3\text{CN}$ .

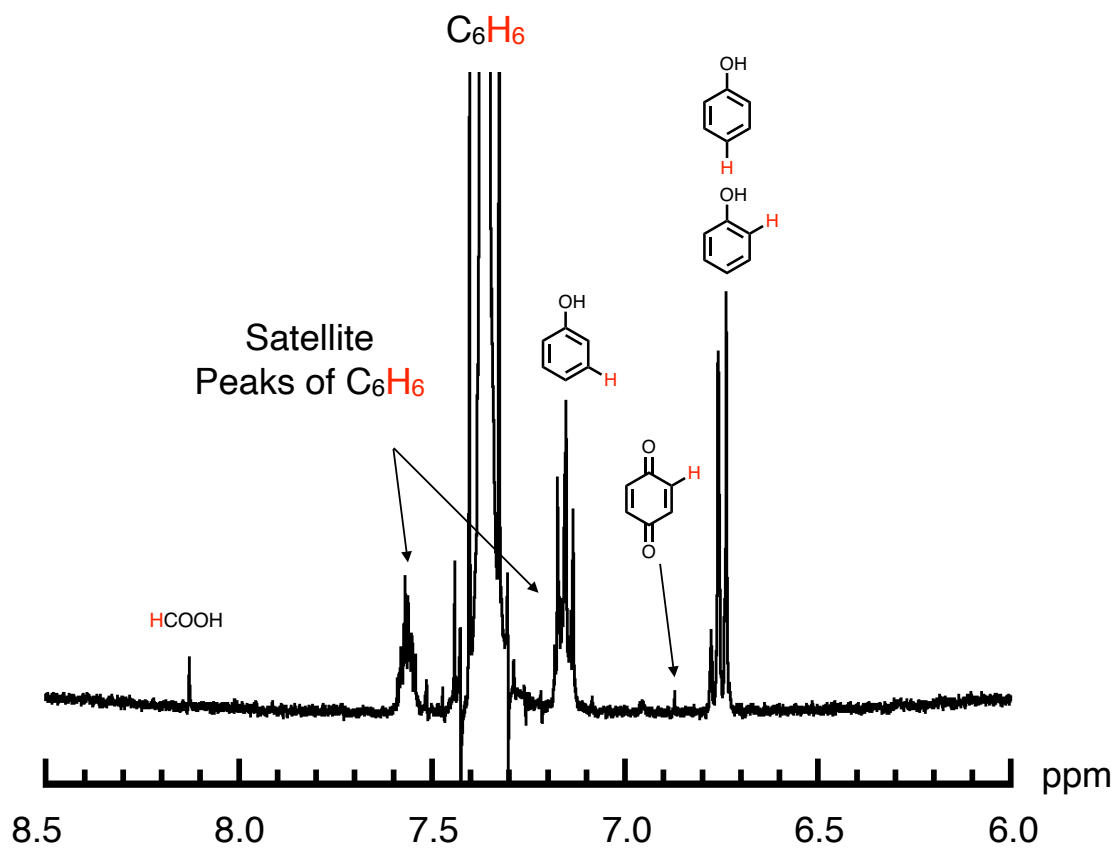

**Figure S3.**  $^1\text{H}$ -NMR spectrum of the reaction mixture of benzene oxidation by  $2^{+\cdot}\text{I}^-$ / $\text{SiO}_2$  in a  $\text{CH}_3\text{CN}$  solution containing excess  $\text{H}_2\text{O}_2$  and TFA at  $40^\circ\text{C}$  for 8 h.

### **Benzene oxidation reaction using H<sub>2</sub>O as a solvent. (Two-phase reaction)**

Benzene oxidation in H<sub>2</sub>O was performed in a glass tube equipped with magnetic stirrer. A mixture of a solid-supported catalyst (10 mg, 49 μM as 2<sup>+</sup>·I<sup>-</sup>), benzene (250 μL, 2.51 M), TFA (12 μL, 138 mM), and 35% aqueous H<sub>2</sub>O<sub>2</sub> (100 μL, 1.03 M) in D<sub>2</sub>O (750 μL) was heated in an oil bath at 40 °C and stirred at 900 rpm for a given reaction time. After the reaction mixture was filtered through a disposable membrane filter (ADVANTEC, DISMIC-13JP), 50 μL of the resulting filtrate was mixed with 670 μL D<sub>2</sub>O and 80 μL of a standard solution (10 mM dimethyl sulfone in D<sub>2</sub>O) for quantitative analysis using <sup>1</sup>H-NMR spectroscopy.

The concentrations of the oxidized products after 8 h reaction were determined as shown below;

Phenol : 0.651 mM

*p*-quinone : not detected

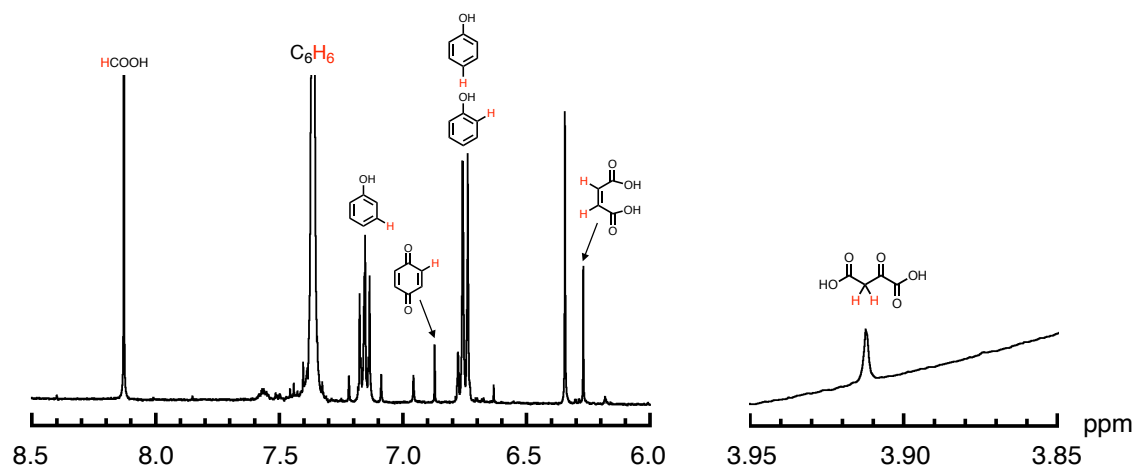

**Figure S4.**  $^1\text{H-NMR}$  spectrum of the reaction mixture of benzene oxidation by  $2^{+\cdot}\text{I}^-/\text{SiO}_2$  in a  $\text{CH}_3\text{CN}$  solution containing excess  $\text{H}_2\text{O}_2$  and TFA at  $60^\circ\text{C}$  for 8 h.

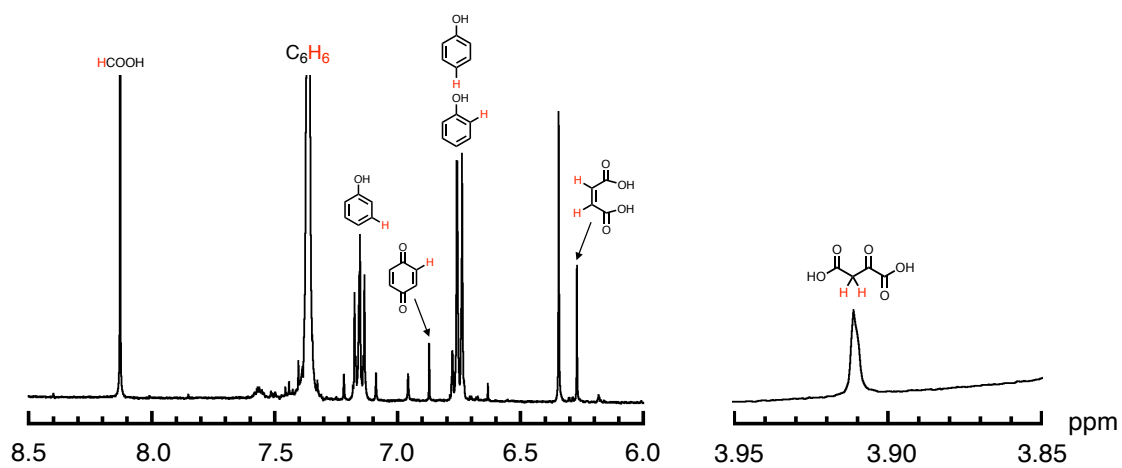

**Figure S5.**  $^1\text{H-NMR}$  spectrum of the reaction mixture of benzene oxidation by  $\mathbf{2^{+}\cdot I^{-}}$  / $\text{SiO}_2$  in a  $\text{CH}_3\text{CN}$  solution containing excess  $\text{H}_2\text{O}_2$  and TFA at  $80\text{ }^\circ\text{C}$  for 8 h.



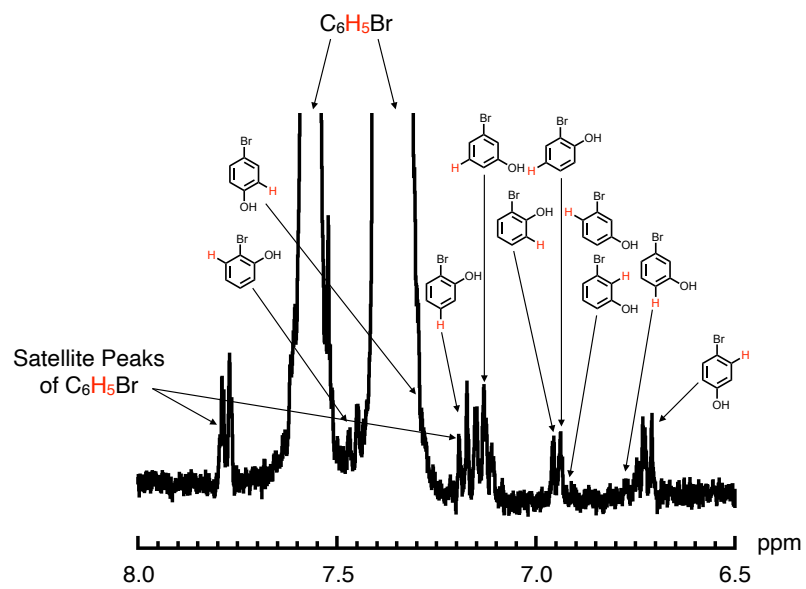

**Figure S6.**  $^1\text{H-NMR}$  spectrum of the reaction mixture of bromobenzene oxidation by  $\mathbf{2}^+\text{I}^-/\text{SiO}_2$  in a  $\text{CH}_3\text{CN}$  solution containing excess  $\text{H}_2\text{O}_2$  and TFA at  $40\text{ }^\circ\text{C}$  for 6 h.

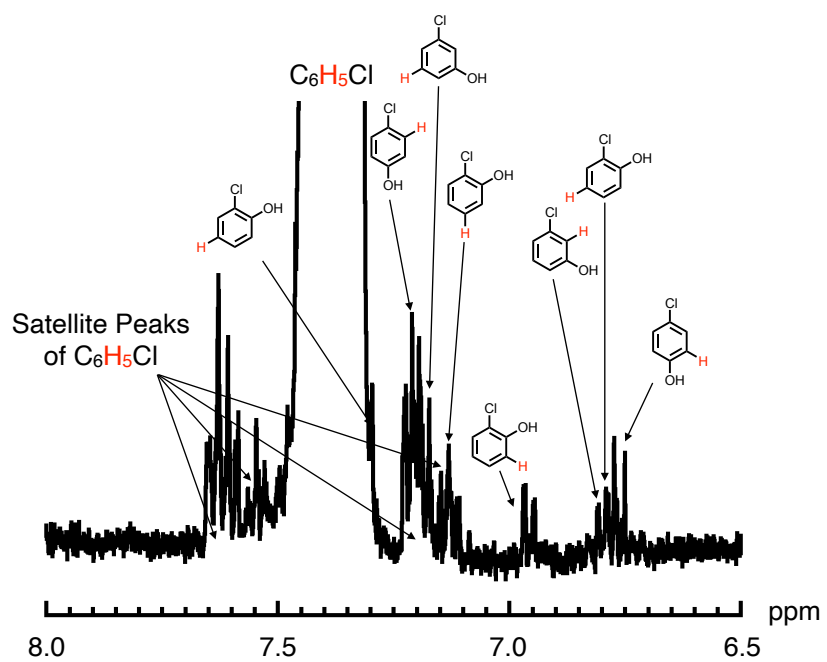

**Figure S7.**  $^1\text{H-NMR}$  spectrum of the reaction mixture of chlorobenzene oxidation by  $2^+\text{-I}/\text{SiO}_2$  in a  $\text{CH}_3\text{CN}$  solution containing excess  $\text{H}_2\text{O}_2$  and TFA at  $40\text{ }^\circ\text{C}$  for 6 h.

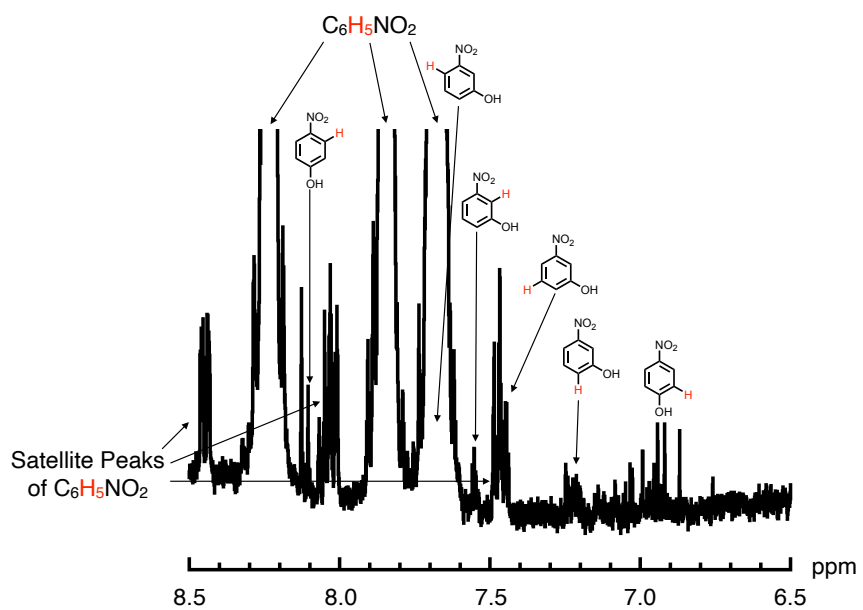

**Figure S8.**  $^1\text{H-NMR}$  spectrum of the reaction mixture of nitrobenzene oxidation by  $2^+\cdot\text{I}^-/\text{SiO}_2$  in a  $\text{CH}_3\text{CN}$  solution containing excess  $\text{H}_2\text{O}_2$  and TFA at  $40^\circ\text{C}$  for 6 h.

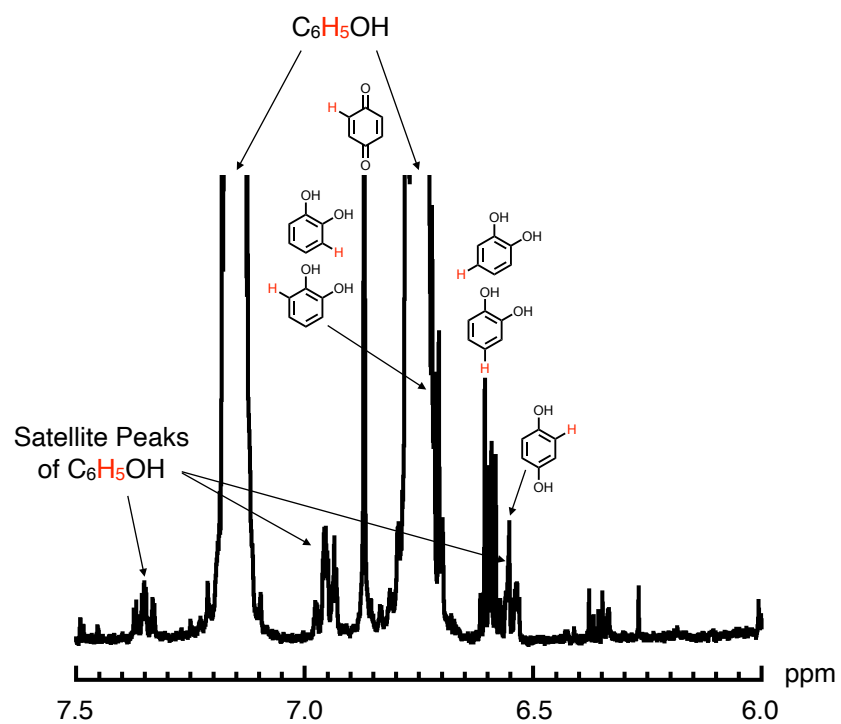

**Figure S9.**  $^1\text{H-NMR}$  spectrum of the reaction mixture of phenol oxidation by  $2^+\cdot\text{I}^-/\text{SiO}_2$  in a  $\text{CH}_3\text{CN}$  solution containing excess  $\text{H}_2\text{O}_2$  and TFA at  $40\text{ }^\circ\text{C}$  for 6 h.

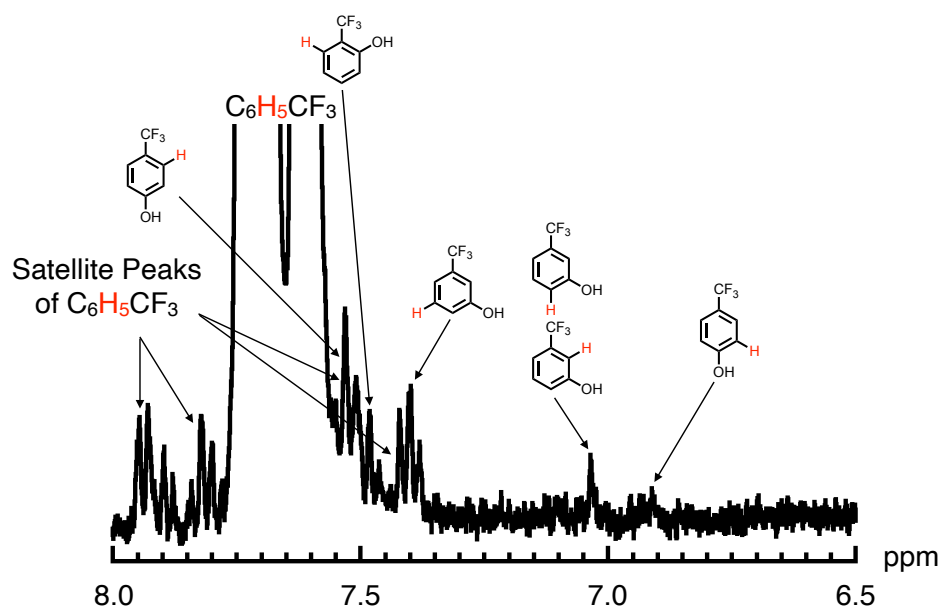

**Figure S10.**  $^1\text{H-NMR}$  spectrum of the reaction mixture of trifluoromethylbenzene oxidation by  $2^+\text{I}^-/\text{SiO}_2$  in a  $\text{CH}_3\text{CN}$  solution containing excess  $\text{H}_2\text{O}_2$  and TFA at  $40\text{ }^\circ\text{C}$  for 6 h.

### Investigation of the kinetic isotope effects.

Benzene oxidation was performed in a glass tube equipped with magnetic stirrer. A mixture of a solid-supported catalyst (10 mg, 24  $\mu\text{M}$  as  $2^+\cdot\text{I}^-$ ), benzene or benzene- $d_6$  (470 mM), TFA (24  $\mu\text{L}$ , 138 mM), and 35% aqueous  $\text{H}_2\text{O}_2$  (100  $\mu\text{L}$ , 514 mM) in  $\text{CH}_3\text{CN}$  (2.0 mL) was heated in an oil bath at 40  $^\circ\text{C}$  with stirring at 900 rpm for 1 h. After the reaction mixture was filtered through a disposable membrane filter (ADVANTEC, DISMIC-13JP), the filtrate (0.10 mL) was diluted with  $\text{CH}_3\text{CN}$  (0.90 mL). The resulting solutions were analysed by GC-MS (Agilent 7890A equipped with JEOL JMS-T100GCV, detection: EI, column: Agilent DB-WAX UI, external standard: 1-chlorodecane (10  $\mu\text{M}$ ), temperature conditions: initial: 60  $^\circ\text{C}$ —hold (2 min)—raise to 240  $^\circ\text{C}$  (8  $^\circ\text{C}/\text{min}$ )—hold (8 min)).

The retention times of both of  $\text{C}_6\text{H}_5\text{OH}$  and  $\text{C}_6\text{D}_5\text{OH}$  were 23.1 min. The concentrations of the corresponding phenols in the reaction mixtures were determined based on the calibration curves for  $\text{C}_6\text{H}_5\text{OH}$  or  $\text{C}_6\text{D}_5\text{OH}$  as shown below;

$\text{C}_6\text{H}_6$  oxidation :  $[\text{C}_6\text{H}_5\text{OH}] = 23.1 \mu\text{M}$

$\text{C}_6\text{D}_6$  oxidation :  $[\text{C}_6\text{D}_5\text{OH}] = 20.3 \mu\text{M}$

Based on these data,  $k_{\text{H}}/k_{\text{D}}$  was calculated to be 1.14.

**Reference:**

- [1] Y. Yamada, J. Kura, Y. Toyoda, K. Tanaka, *Dalton Trans.*, 2021, **50**, 6718–6724.
